# Supplementary material for: The Relationship of Tumor Microbiome and Oral Bacteria and Intestinal Dysbiosis in Canine Mammary Tumor
Source: MDPI journal article supplement (doi:10.3390/ijms231810928), 2022-09-18
Supplement: s1 [file s1]

Figure S1 Comparisons of microbiota diversity between canine mammary tumor tissues (CMT) and canine tumor-adjacent tissues (CAT). A. Alpha diversity (Chao1 index) of microbial communities between both CMT group and CAT group; B and C. The intratumoral microbiota which had significantly different abundance in CMT and CAT groups at phylum (B) and genus (C) levels.

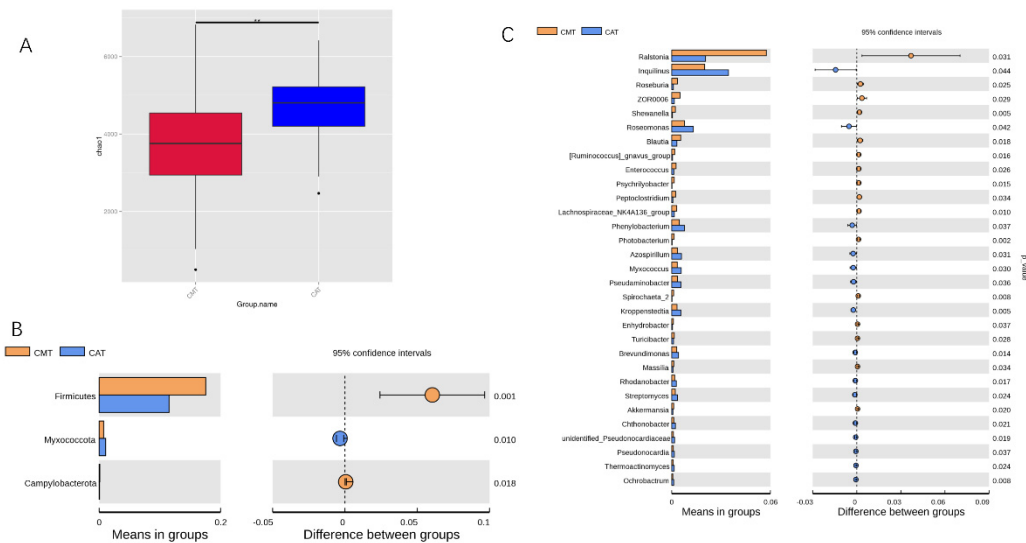

Figure S2 Oral microbial composition and diversity in diseased dogs with canine mammary tumors (OBC group) and healthy dogs (ONN group). A and B. Alpha diversity (Simpson and ACE index) of oral microbial communities in OBC and ONN groups: they had a significant difference between both two groups; C. Beta diversity (Anosim analysis) of microbial community structures between both OBC and ONN groups; D. The Non-Metric Multi-Dimensional Scaling (NMDS) analysis of two groups: it exhibited that the stress value of OBC and ONN groups was 0.127 (less than 0.2); E and F. The distribution of top 10 phyla (E) and top 10 genera (F) detected in OBC and ONN groups.

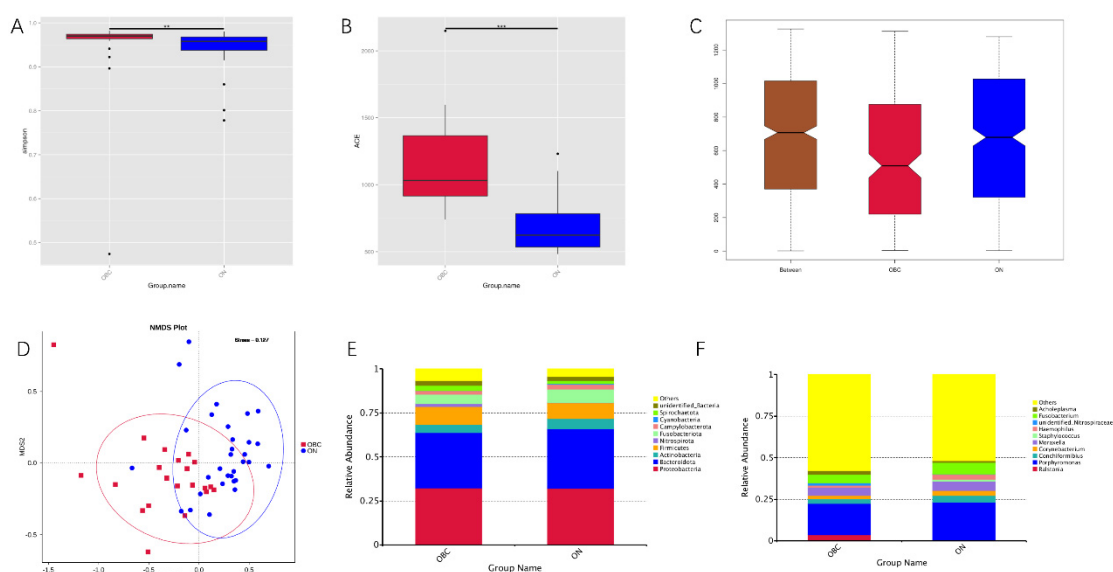

Figure S3 The gut microbial composition and diversity in diseased dogs with canine mammary tumors (SBC group) and healthy dogs (SNN group). A. The distribution of top 10 phyla detected in SBC and SNN groups; B. The gut microorganisms which had significantly different abundance in SBC and SNN groups at genus level.

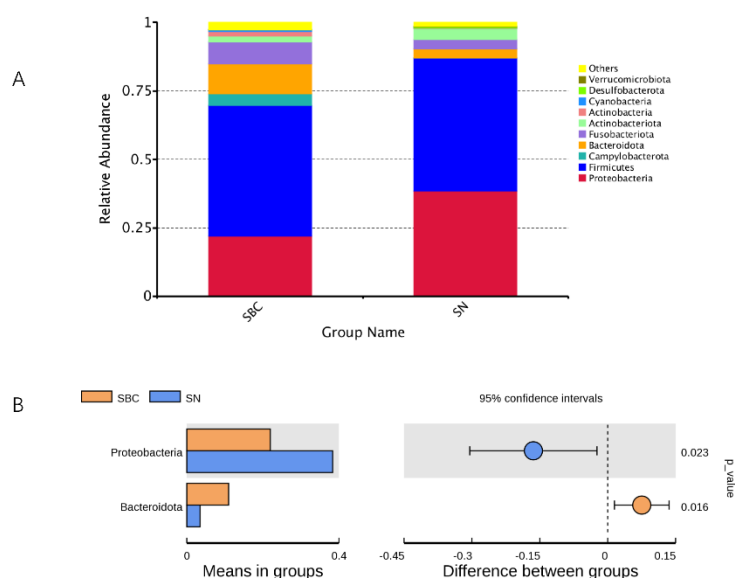

Table S1 The clinical information of healthy dogs and diseased dogs with canine mammary tumors

| Health status of dogs | Tumor tissue | Tumor-adjacent tissue | Oral swab | Faeces | Breed | Somatotype | Age (years) | Gender | Spayed status | Pathologic diagnosis |
|-----------------------|--------------|-----------------------|-----------|--------|-------|------------|-------------|--------|---------------|----------------------|
|-----------------------|--------------|-----------------------|-----------|--------|-------|------------|-------------|--------|---------------|----------------------|

|                       |       |        |        |          |                      |        |    |        |     |           |
|-----------------------|-------|--------|--------|----------|----------------------|--------|----|--------|-----|-----------|
| Cannine mammary tumor | DB001 | —      | —      | SBC001~3 | Samoyed              | Medium | 10 | Female | No  | Malignant |
| Cannine mammary tumor | DB002 | —      | —      | —        | Poodle               | Small  | 16 | Female | No  | Malignant |
| Cannine mammary tumor | DB003 | —      | —      | —        | Poodle               | Small  | 16 | Female | No  | Malignant |
| Cannine mammary tumor | —     | NBC003 | —      | —        | Teddydog             | Small  | 12 | Female | No  | Malignant |
| Cannine mammary tumor | DB004 | —      | OBC004 | —        | Cocker               | Small  | 11 | Female | Yes | Malignant |
| Cannine mammary tumor | DB005 | —      | —      | —        | Bobbie               | Small  | 14 | Female | No  | Benign    |
| Cannine mammary tumor | DB006 | —      | —      | —        | Bulldog              | Medium | 4  | Female | Yes | Benign    |
| Cannine mammary tumor | DB007 | —      | —      | SBC007   | Italian Greyhound    | Small  | 12 | Female | No  | Malignant |
| Cannine mammary tumor | DB008 | —      | OBC008 | SBC008   | Mixed breed          | Medium | 12 | Female | Yes | Malignant |
| Cannine mammary tumor | DB010 | —      | OBC009 | SBC009   | Pekingese            | Small  | 12 | Female | No  | Benign    |
| Cannine mammary tumor | DB011 | —      | OBC010 | SBC010   | Teddydog             | Small  | 13 | Female | No  | Benign    |
| Cannine mammary tumor | DB012 | —      | OBC011 | SBC011   | Old English Sheepdog | Large  | 14 | Female | No  | Malignant |
| Cannine mammary tumor | DB013 | —      | OBC012 | SBC012   | Tibetan Mastiff      | Large  | 10 | Female | No  | Malignant |
| Cannine mammary tumor | —     | —      | OBC013 | SBC013   | Teddydog             | Small  | 8  | Female | No  | Benign    |
| Cannine mammary tumor | DB014 | DBH014 | OBC014 | SBC014   | Golden retriever     | Large  | 12 | Female | No  | Malignant |
| Cannine mammary tumor | DB015 | —      | OBC015 | SBC015   | Teddydog             | Small  | 9  | Female | Yes | Benign    |
| Cannine mammary tumor | —     | —      | OBC016 | —        | Mixed breed          | Medium | 9  | Female | No  | Benign    |
| Cannine mammary tumor | —     | DNB017 | OBC017 | SBC017   | Teddydog             | Small  | 8  | Female | No  | Benign    |
| Cannine mammary tumor | DB016 | DBH016 | OBC018 | SBC018   | Schnauzer            | Small  | 12 | Female | Yes | Benign    |
| Cannine mammary tumor | DB017 | —      | OBC019 | SBC019   | Teddydog             | Small  | 5  | Female | No  | Malignant |
| Cannine mammary tumor | DB018 | DNB218 | —      | —        | Teddydog             | Small  | 9  | Female | No  | Benign    |
| Cannine mammary tumor | DB019 | —      | OBC021 | SBC021   | Mixed breed          | Medium | 13 | Female | No  | Benign    |
| Cannine mammary tumor | DB020 | —      | OBC022 | SBC022   | Samoyed              | Medium | 13 | Female | Yes | Malignant |
| Cannine mammary tumor | DB021 | —      | —      | —        | Samoyed              | Medium | 13 | Female | Yes | Malignant |
| Cannine mammary tumor | DB022 | —      | OBC023 | SBC023   | Border Collie        | Medium | 8  | Female | No  | Malignant |
| Cannine mammary tumor | DB023 | —      | —      | —        | Border Collie        | Medium | 8  | Female | No  | Malignant |
| Cannine mammary tumor | DB024 | —      | —      | —        | Border Collie        | Medium | 8  | Female | No  | Malignant |
| Cannine mammary tumor | DB025 | —      | OBC024 | SBC024   | Mixed breed          | Small  | 14 | Female | No  | Malignant |
| Cannine mammary tumor | DB026 | DBH026 | —      | —        | Teddydog             | Small  | 7  | Male   | No  | Malignant |

|                       |        |        |        |        |               |        |    |        |     |           |
|-----------------------|--------|--------|--------|--------|---------------|--------|----|--------|-----|-----------|
| Cannine mammary tumor | DB027  | DBH027 | —      | —      | Mixed breed   | Medium | 13 | Female | No  | Benign    |
| Cannine mammary tumor | DB028  | —      | —      | —      | Teddydog      | Small  | 8  | Female | No  | Malignant |
| Cannine mammary tumor | DB029  | —      | —      | —      | Samoyed       | Medium | 7  | Female | No  | Benign    |
| Cannine mammary tumor | DB030  | —      | —      | —      | Samoyed       | Medium | 8  | Female | No  | Malignant |
| Cannine mammary tumor | DB031  | —      | —      | —      | Teddydog      | Small  | 9  | Female | No  | Malignant |
| Cannine mammary tumor | DB032  | —      | —      | —      | Teddydog      | Small  | 12 | Female | No  | Malignant |
| Cannine mammary tumor | DB033  | —      | —      | —      | Samoyed       | Medium | 11 | Female | No  | Malignant |
| Cannine mammary tumor | DB034  | —      | —      | —      | Papillon      | Small  | 10 | Female | No  | Benign    |
| Cannine mammary tumor | DB035  | —      | —      | —      | Teddydog      | Small  | 7  | Female | No  | Malignant |
| Cannine mammary tumor | DB036  | —      | —      | —      | Samoyed       | Medium | 9  | Female | No  | Malignant |
| Cannine mammary tumor | DBF037 | DNB037 | —      | —      | Teddydog      | Small  | 11 | Female | Yes | Benign    |
| Cannine mammary tumor | DBF038 | —      | —      | —      | Pomeranian    | Small  | 11 | Female | No  | Benign    |
| Cannine mammary tumor | DBF039 | —      | —      | —      | Pomeranian    | Small  | 11 | Female | No  | Benign    |
| Cannine mammary tumor | DBF040 | DNB040 | OBC032 | SBC032 | Schnauzer     | Small  | 3  | Female | No  | Benign    |
| Cannine mammary tumor | DBF041 | —      | —      | —      | Schnauzer     | Small  | 3  | Female | No  | Benign    |
| Cannine mammary tumor | DBF042 | —      | —      | —      | Pomeranian    | Small  | 8  | Female | No  | Benign    |
| Cannine mammary tumor | DBC043 | DNB043 | OBC034 | SBC034 | Teddydog      | Small  | 7  | Female | No  | Malignant |
| Cannine mammary tumor | DBC044 | —      | —      | —      | Mixed breed   | Medium | 13 | Female | Yes | Malignant |
| Cannine mammary tumor | DBC045 | NBC045 | —      | —      | Teddydog      | Small  | 12 | Female | No  | Malignant |
| Cannine mammary tumor | DBC046 | —      | —      | —      | Teddydog      | Small  | 8  | Female | No  | Malignant |
| Cannine mammary tumor | DBC047 | —      | —      | —      | Teddydog      | Small  | 12 | Female | No  | Malignant |
| Cannine mammary tumor | DBC048 | —      | —      | —      | Teddydog      | Small  | 12 | Female | No  | Malignant |
| Cannine mammary tumor | DBC049 | NBC049 | OBC037 | SBC037 | Border Collie | Medium | 9  | Female | Yes | Malignant |
| Cannine mammary tumor | DBC050 | NBC050 | —      | —      | Pomeranian    | Small  | 11 | Female | Yes | Malignant |
| Cannine mammary tumor | DBC051 | NBC051 | —      | —      | Border Collie | Medium | 9  | Female | Yes | Malignant |
| Cannine mammary tumor | DBC052 | —      | —      | —      | Teddydog      | Small  | 10 | Female | No  | Malignant |
| Cannine mammary tumor | DBC053 | —      | —      | —      | Teddydog      | Small  | 9  | Female | Yes | Malignant |
| Cannine mammary tumor | DBC054 | —      | —      | —      | Teddydog      | Small  | 10 | Female | Yes | Malignant |
| Cannine mammary tumor | DBC055 | —      | —      | —      | Teddydog      | Small  | 8  | Female | No  | Malignant |

|                       |        |        |   |   |                      |        |    |        |     |           |
|-----------------------|--------|--------|---|---|----------------------|--------|----|--------|-----|-----------|
| Cannine mammary tumor | DBC056 | —      | — | — | Border Collie        | Medium | 9  | Female | No  | Malignant |
| Cannine mammary tumor | DBC057 | —      | — | — | Pomeranian           | Small  | 11 | Female | No  | Malignant |
| Cannine mammary tumor | DBC058 | —      | — | — | Border Collie        | Medium | 9  | Female | No  | Malignant |
| Cannine mammary tumor | DBC059 | NBC059 | — | — | Border Collie        | Medium | 9  | Female | No  | Malignant |
| Cannine mammary tumor | DBC060 | NBC060 | — | — | Bichon Frise         | Small  | 10 | Female | No  | Malignant |
| Cannine mammary tumor | DBC061 | NBC061 | — | — | Border Collie        | Medium | 9  | Female | No  | Malignant |
| Cannine mammary tumor | DBC062 | —      | — | — | Border Collie        | Medium | 9  | Female | No  | Malignant |
| Cannine mammary tumor | DBC063 | —      | — | — | Bichon Frise         | Small  | 12 | Female | No  | Malignant |
| Cannine mammary tumor | DBC064 | —      | — | — | Border Collie        | Medium | 9  | Female | No  | Malignant |
| Cannine mammary tumor | DBC065 | —      | — | — | Border Collie        | Medium | 9  | Female | Yes | Malignant |
| Cannine mammary tumor | DBC066 | —      | — | — | Bichon Frise         | Small  | 7  | Female | No  | Malignant |
| Cannine mammary tumor | DBC067 | —      | — | — | Border Collie        | Medium | 9  | Female | Yes | Malignant |
| Cannine mammary tumor | DBC068 | —      | — | — | Border Collie        | Medium | 11 | Female | Yes | Malignant |
| Cannine mammary tumor | DBC069 | —      | — | — | Mixed breed          | Medium | 4  | Female | No  | Benign    |
| Cannine mammary tumor | DBC070 | —      | — | — | Border Collie        | Medium | 9  | Female | No  | Malignant |
| Cannine mammary tumor | DBC071 | —      | — | — | Border Collie        | Medium | 14 | Female | No  | Malignant |
| Cannine mammary tumor | DBC072 | —      | — | — | Poodle               | Small  | 6  | Female | No  | Malignant |
| Cannine mammary tumor | DBC073 | —      | — | — | Border Collie        | Medium | 9  | Female | No  | Malignant |
| Cannine mammary tumor | DBC074 | —      | — | — | Welsh corgi pembroke | Small  | 9  | Female | No  | Malignant |
| Cannine mammary tumor | DBC075 | NBC075 | — | — | Border Collie        | Medium | 9  | Female | Yes | Malignant |
| Cannine mammary tumor | DBC076 | NBC076 | — | — | Border Collie        | Medium | 9  | Female | Yes | Malignant |
| Cannine mammary tumor | DBC077 | NBC077 | — | — | Golden retriever     | Large  | 5  | Female | No  | Malignant |
| Cannine mammary tumor | DBC078 | —      | — | — | Border Collie        | Medium | 9  | Female | Yes | Malignant |
| Cannine mammary tumor | DBC079 | —      | — | — | Shiba Inu            | Medium | 10 | Female | Yes | Malignant |
| Cannine mammary tumor | DBC080 | —      | — | — | Border Collie        | Medium | 9  | Female | Yes | Malignant |
| Cannine mammary tumor | DBF084 | —      | — | — | Alaskan Malamute     | Large  | 5  | Female | No  | Benign    |
| Cannine mammary tumor | DBF085 | —      | — | — | Alaskan Malamute     | Large  | 8  | Female | No  | Benign    |
| Cannine mammary tumor | DBF086 | —      | — | — | Alaskan Malamute     | Large  | 5  | Female | No  | Benign    |
| Cannine mammary tumor | DB091  | —      | — | — | Poodle               | Small  | 7  | Female | No  | Malignant |

|                       |        |        |        |        |                      |        |    |        |    |           |
|-----------------------|--------|--------|--------|--------|----------------------|--------|----|--------|----|-----------|
| Cannine mammary tumor | DB092  | —      | —      | —      | Poodle               | Small  | 6  | Female | No | Malignant |
| Cannine mammary tumor | DB093  | —      | OBC041 | SBC041 | Teddydog             | Small  | 10 | Female | No | Malignant |
| Cannine mammary tumor | DB094  | NBC094 | —      | —      | Teddydog             | Small  | 10 | Female | No | Malignant |
| Cannine mammary tumor | DBF095 | NBC095 | —      | —      | Teddydog             | Small  | 10 | Female | No | Benign    |
| Cannine mammary tumor | DB096  | NBC096 | —      | —      | Teddydog             | Small  | 12 | Female | No | Malignant |
| Cannine mammary tumor | DB097  | —      | —      | —      | Teddydog             | Small  | 13 | Female | No | Malignant |
| Cannine mammary tumor | DB098  | —      | —      | —      | Teddydog             | Small  | 10 | Female | No | Malignant |
| Cannine mammary tumor | DBF099 | —      | —      | —      | Poodle               | Small  | 9  | Female | No | Benign    |
| Heath                 | —      | —      | —      | SN053  | Papillon             | Small  | 2  | Female | No | —         |
| Heath                 | —      | —      | —      | SN054  | Teddydog             | Small  | 7  | Female | No | —         |
| Heath                 | —      | —      | —      | SN055  | Teddydog             | Small  | 8  | Female | No | —         |
| Heath                 | —      | —      | —      | SN056  | Teddydog             | Small  | 12 | Female | No | —         |
| Heath                 | —      | —      | —      | SN061  | Shiba Inu            | Medium | 9  | Female | No | —         |
| Heath                 | —      | —      | —      | SN062  | Golden retriever     | Large  | 6  | Female | No | —         |
| Heath                 | —      | —      | —      | SN063  | Bichon Frise         | Small  | 10 | Female | No | —         |
| Heath                 | —      | —      | —      | SN067  | Golden retriever     | Large  | 5  | Female | No | —         |
| Heath                 | —      | —      | —      | SN070  | Golden retriever     | Large  | 7  | Female | No | —         |
| Heath                 | —      | —      | —      | SN071  | Bichon Frise         | Small  | 11 | Female | No | —         |
| Heath                 | —      | —      | —      | SN072  | Bichon Frise         | Small  | 7  | Female | No | —         |
| Heath                 | —      | —      | —      | SN077  | Chihuahua            | Small  | 12 | Female | No | —         |
| Heath                 | —      | —      | —      | SN080  | Pomeranian           | Small  | 10 | Female | No | —         |
| Heath                 | —      | —      | —      | SN084  | Bichon Frise         | Small  | 9  | Female | No | —         |
| Heath                 | —      | —      | —      | SN091  | Shiba Inu            | Medium | 11 | Female | No | —         |
| Heath                 | —      | —      | —      | SN092  | French bulldog       | Medium | 13 | Female | No | —         |
| Heath                 | —      | —      | —      | SN093  | Mixed breed          | Medium | 9  | Female | No | —         |
| Heath                 | —      | —      | —      | SN101  | Border Collie        | Medium | 9  | Female | No | —         |
| Heath                 | —      | —      | —      | SN105  | Teddydog             | Small  | 14 | Female | No | —         |
| Heath                 | —      | —      | —      | SN107  | Teddydog             | Small  | 16 | Female | No | —         |
| Heath                 | —      | —      | —      | SN115  | Schnauzer            | Small  | 10 | Female | No | —         |
| Heath                 | —      | —      | ON006  | —      | Teddydog             | Small  | 5  | Female | No | —         |
| Heath                 | —      | —      | ON011  | —      | Mixed breed          | Medium | 12 | Female | No | —         |
| Heath                 | —      | —      | ON014  | —      | Pomeranian           | Small  | 12 | Female | No | —         |
| Heath                 | —      | —      | ON017  | —      | Teddydog             | Small  | 13 | Female | No | —         |
| Heath                 | —      | —      | ON022  | —      | Golden retriever     | Large  | 3  | Female | No | —         |
| Heath                 | —      | —      | ON025  | —      | Bichon Frise         | Small  | 8  | Female | No | —         |
| Heath                 | —      | —      | ON028  | —      | Chow Chow            | Large  | 9  | Female | No | —         |
| Heath                 | —      | —      | ON036  | —      | Bichon Frise         | Small  | 5  | Female | No | —         |
| Heath                 | —      | —      | ON052  | —      | Bichon Frise         | Small  | 11 | Female | No | —         |
| Heath                 | —      | —      | ON058  | —      | Bichon Frise         | Small  | 10 | Female | No | —         |
| Heath                 | —      | —      | ON059  | —      | Bichon Frise         | Small  | 9  | Female | No | —         |
| Heath                 | —      | —      | ON063  | —      | Bichon Frise         | Small  | 8  | Female | No | —         |
| Heath                 | —      | —      | ON074  | —      | Cocker               | Small  | 5  | Female | No | —         |
| Heath                 | —      | —      | ONN001 | —      | Bichon Frise         | Small  | 10 | Female | No | —         |
| Heath                 | —      | —      | ONN003 | —      | Teddydog             | Small  | 9  | Female | No | —         |
| Heath                 | —      | —      | ONN004 | —      | Bichon Frise         | Small  | 10 | Female | No | —         |
| Heath                 | —      | —      | ONN005 | —      | Shih Tzu             | Small  | 11 | Female | No | —         |
| Heath                 | —      | —      | ONN007 | —      | Welsh corgi pembroke | Small  | 12 | Female | No | —         |
| Heath                 | —      | —      | ONN010 | —      | Shih Tzu             | Small  | 5  | Female | No | —         |
| Heath                 | —      | —      | ONN011 | —      | Teddydog             | Small  | 9  | Female | No | —         |

|       |   |   |        |   |                |        |    |        |     |   |
|-------|---|---|--------|---|----------------|--------|----|--------|-----|---|
| Heath | — | — | ONN013 | — | Teddydog       | Small  | 12 | Female | No  | — |
| Heath | — | — | ONN014 | — | Mixed breed    | Medium | 13 | Female | Yes | — |
| Heath | — | — | ONN016 | — | Teddydog       | Small  | 9  | Female | Yes | — |
| Heath | — | — | ONN017 | — | Mixed breed    | Medium | 8  | Female | Yes | — |
| Heath | — | — | ONN023 | — | Mixed breed    | Medium | 9  | Female | Yes | — |
| Heath | — | — | ONN025 | — | French bulldog | Medium | 10 | Female | Yes | — |
| Heath | — | — | ONN026 | — | French bulldog | Medium | 8  | Female | Yes | — |
| Heath | — | — | ONN027 | — | Mixed breed    | Medium | 11 | Female | No  | — |
| Heath | — | — | ONN028 | — | Mixed breed    | Medium | 10 | Female | Yes | — |
| Heath | — | — | ONN029 | — | Teddydog       | Small  | 11 | Female | No  | — |
| Heath | — | — | ONN030 | — | Shih Tzu       | Small  | 10 | Female | Yes | — |
